# Supplementary material for: Cirrhosis-Associated RAS-Inflammation-Coagulation Axis Anomalies: Parallels to Severe COVID-19
Source: MDPI journal article supplement (doi:10.3390/jpm11121264), 2021-12-01

## Supplementary Material

**Table-S1. Characteristics of cirrhotic patients (cohort 1) and comparison between HVPG strata**

| Patient characteristics                                      | All patients  |                | HVPG             |                | p-value          |
|--------------------------------------------------------------|---------------|----------------|------------------|----------------|------------------|
|                                                              | (n=127)       | 6-9mmHg (n=16) | 10-19mmHg (n=64) | ≥20mmHg (n=47) |                  |
| Sex, male/female (% male)                                    | 83/44 (65.4%) | 10/6 (62.5%)   | 42/22 (65.6%)    | 31/16 (66.0%)  | 0.967            |
| Age, years (IQR)                                             | 56.6 (15.5)   | 52.8 (17.8)    | 53.4 (15.4)      | 57.1 (15.0)    | 0.285            |
| Etiology of CLD                                              |               |                |                  |                | <b>0.003</b>     |
| ALD, n (%)                                                   | 63 (49.6%)    | 3 (18.8%)      | 27 (42.2%)       | 33 (70.2%)     |                  |
| Viral, n (%)                                                 | 19 (15.0%)    | 5 (31.3%)      | 10 (15.6%)       | 4 (8.5%)       |                  |
| MIX (ALD/Viral), n (%)                                       | 5 (3.9%)      | 0 (0.0%)       | 4 (6.3%)         | 1 (2.1%)       |                  |
| NASH, n (%)                                                  | 8 (6.3%)      | 2 (12.5%)      | 6 (9.4%)         | 0 (0.0%)       |                  |
| Cholestatic, n (%)                                           | 11 (8.7%)     | 0 (0.0%)       | 6 (9.4%)         | 5 (10.6%)      |                  |
| Other, n (%)                                                 | 21 (16.5%)    | 6 (37.5%)      | 11 (17.2%)       | 4 (8.5%)       |                  |
| MELD, median (IQR)                                           | 11 (6)        | 8 (2)          | 10 (5)           | 14 (7)         | <b>&lt;0.001</b> |
| CTP Score, median (IQR)                                      | 6 (3)         | 5 (0)          | 6 (2)            | 7 (3)          | <b>&lt;0.001</b> |
| Child-A, n (%)                                               | 65 (51.2%)    | 13 (81.3%)     | 37 (57.8%)       | 15 (31.9%)     | <b>0.004</b>     |
| Child-B, n (%)                                               | 52 (40.9%)    | 3 (18.7%)      | 24 (37.5%)       | 25 (53.2%)     |                  |
| Child-C, n (%)                                               | 10 (7.9%)     | 0 (0.0%)       | 3 (4.7%)         | 7 (14.9%)      |                  |
| Albumin, g x L <sup>-1</sup> (IQR)                           | 36.5 (7.6)    | 42.9 (5.3)     | 37.0 (6.9)       | 35.7 (7.2)     | <b>&lt;0.001</b> |
| Bilirubin, mg x dL <sup>-1</sup> (IQR)                       | 1.21 (1.26)   | 0.83 (0.68)    | 1.07 (1.01)      | 1.62 (1.73)    | <b>0.005</b>     |
| INR, median (IQR)                                            | 1.4 (0.3)     | 1.1 (0.2)      | 1.3 (0.3)        | 1.5 (0.3)      | <b>&lt;0.001</b> |
| Creatinine, mg x dL <sup>-1</sup> (IQR)                      | 0.72 (0.25)   | 0.85 (0.27)    | 0.71 (0.23)      | 0.67 (0.27)    | 0.267            |
| Sodium, mmol x L <sup>-1</sup> (IQR)                         | 139.0 (5.0)   | 140.0 (5.0)    | 139.0 (4.0)      | 137.0 (5.0)    | <b>0.004</b>     |
| D-dimer, µg x mL <sup>-1</sup> (IQR)                         | 0.62 (1.75)   | 0.37 (0.32)    | 0.56 (1.48)      | 1.23 (2.73)    | <b>&lt;0.001</b> |
| Von Willebrand factor antigen, % (IQR)                       | 267.0 (136.0) | 179.5 (58.0)   | 257.0 (142.0)    | 319 (131.0)    | <b>&lt;0.001</b> |
| Prothrombin fragment F1,2, pmol x L <sup>-1</sup> (IQR)      | 282.0 (265.0) | 384.5 (387.2)  | 300.0 (269.0)    | 244.0 (213.0)  | 0.150            |
| Plasminogen activator inhibitor, IU x mL <sup>-1</sup> (IQR) | 0.89 (2.01)   | 0.89 (1.91)    | 0.89 (1.78)      | 0.89 (2.16)    | 0.535            |
| α-2 antiplasmin activity, % (IQR)                            | 67.0 (24.0)   | 80.0 (16.8)    | 69.0 (18.5)      | 57.0 (21.0)    | <b>&lt;0.001</b> |
| Plasminogen activity, % (IQR)                                | 65.5 (21.0)   | 83.5 (21.0)    | 66.0 (21.0)      | 64.0 (13.0)    | <b>&lt;0.001</b> |
| C-reactive protein, mg x dL <sup>-1</sup> (IQR)              | 0.29 (0.51)   | 0.09 (0.25)    | 0.13 (0.44)      | 0.43 (0.67)    | <b>0.006</b>     |

|                                                               |               |              |               |               |                  |
|---------------------------------------------------------------|---------------|--------------|---------------|---------------|------------------|
| Interleukin-6, pg x mL <sup>-1</sup> (IQR)                    | 8.86 (11.1)   | 2.85 (2.97)  | 8.46 (13.51)  | 9.77 (10.94)  | <b>&lt;0.001</b> |
| Angiotensin converting enzyme, U x L <sup>-1</sup> (IQR)      | 48.9 (39.2)   | 37.25 (17.3) | 43.55 (44.68) | 60.40 (29.9)  | <b>0.003</b>     |
| Plasma renin concentration, μIU x mL <sup>-1</sup> (IQR)      | 22.0 (103.9)  | 14.5 (24.6)  | 18.4 (71.6)   | 62.1 (206.1)  | <b>0.015</b>     |
| Plasma aldosterone concentration, pg x mL <sup>-1</sup> (IQR) | 109.5 (247.0) | 101.5 (99.0) | 95.0 (184.0)  | 204.0 (449.0) | 0.158            |

**Figure-S1. Plasma levels of (A) angiotensin-converting enzyme (ACE), (B) renin, (C) prothrombin fragment F1,2, (D)  $\alpha$ 2-antiplasmin, (E) C-reactive protein (CRP) and (F) interleukin-6 (IL-6) stratified for hepatic venous pressure gradient (HVPG). The borders of the whiskers are the 10<sup>th</sup> and the 90<sup>th</sup> percentile.**

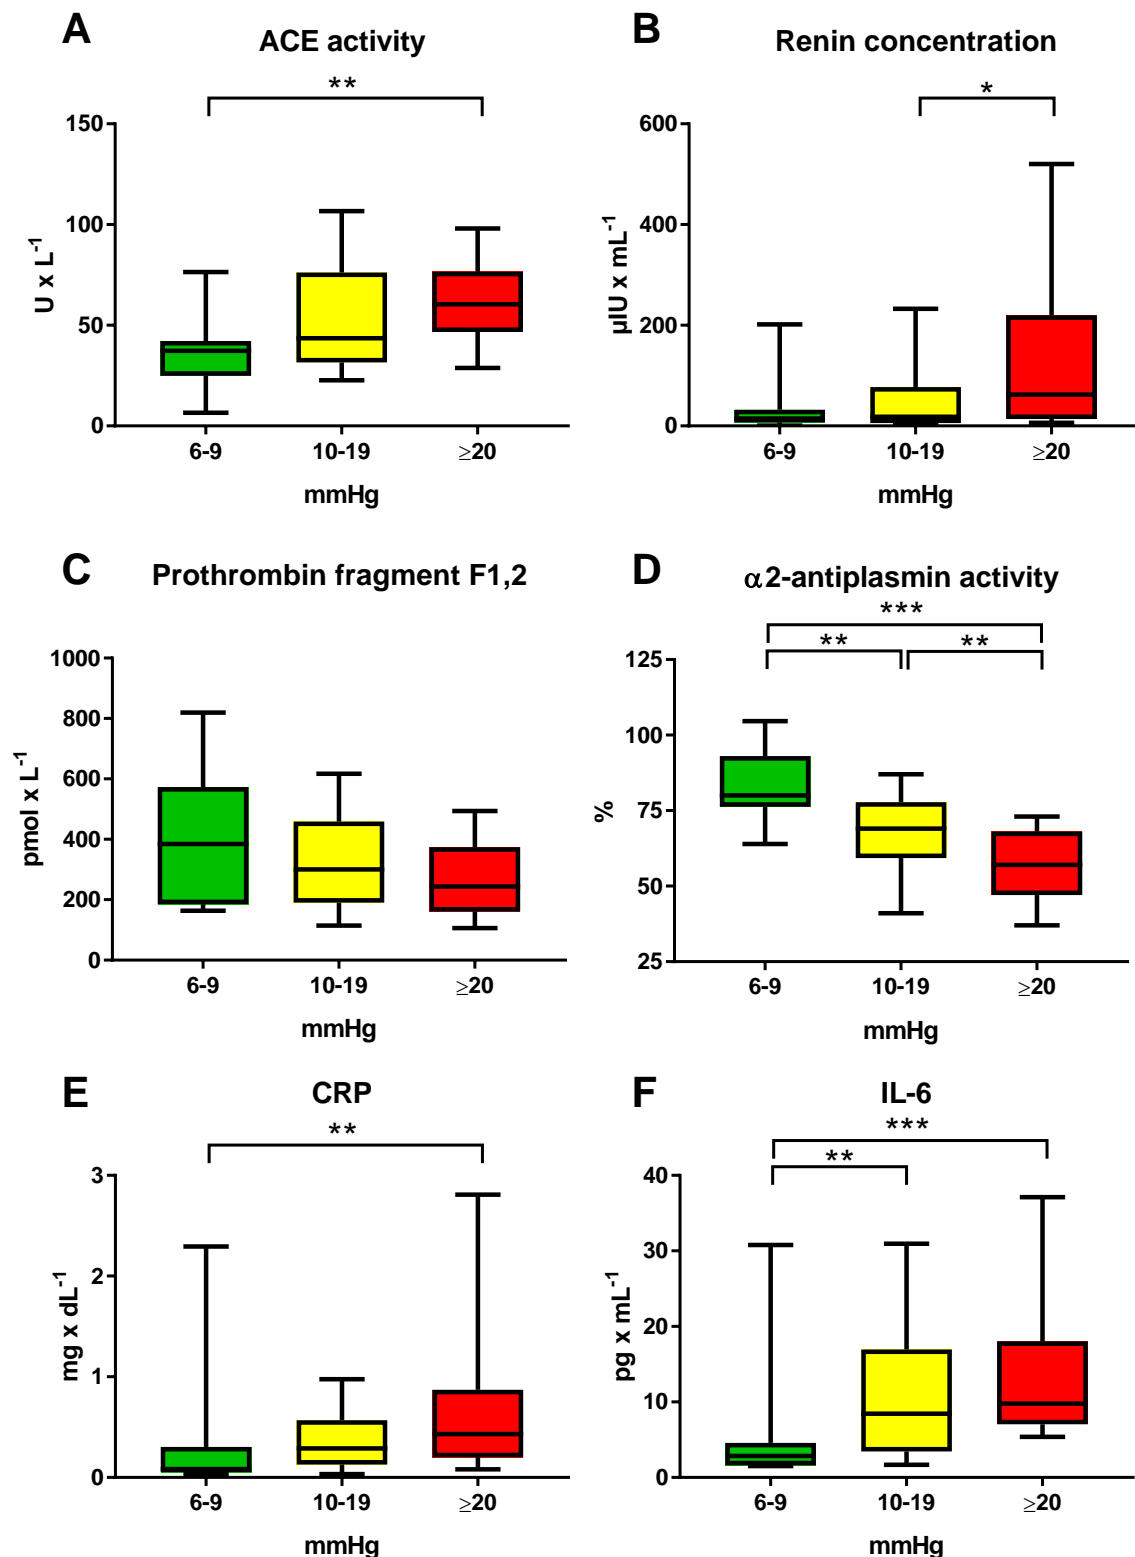

Supplement: s1 [file s1]
